# Supplementary material for: Enrichment of Activated Fibroblasts as a Potential Biomarker for a Non-Durable Response to Anti-Tumor Necrosis Factor Therapy in Patients with Crohn’s Disease
Source: MDPI journal article supplement (doi:10.3390/ijms241914799), 2023-09-30
Supplement: s1 [file s1]

| DEG              | Non-inflamed vs Uninflamed(CD) | DEG                | Non-inflamed_1 vs Inflamed_2 |
|------------------|--------------------------------|--------------------|------------------------------|
| *qcFtest         | 2,368                          | *qcFtest           | 3,066                        |
| Up(non-inflamed) | 1,594                          | Up(non-inflamed_2) | 1,373                        |

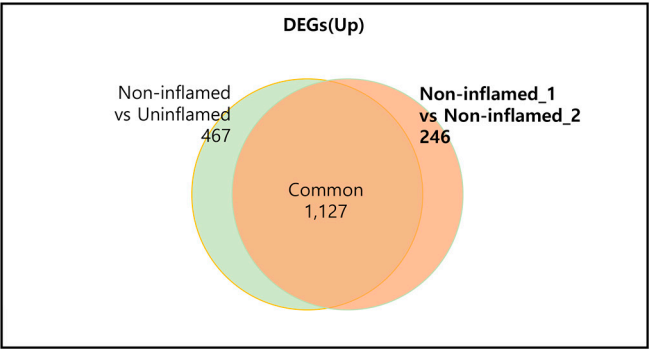

\*qcFtest = p-value < 0.05 & Abs(LogFC) > 1
